# Supplementary material for: Combinatorial Metabolic Engineering and Enzymatic Catalysis Enable Efficient Production of Colanic Acid
Source: MDPI journal article supplement (doi:10.3390/microorganisms10050877), 2022-04-22
Supplement: s1 [file s1]

Table S1: Bacterial strains and plasmids used in this study

| Strain or plasmid    | Description                                                                                                                                | Sources   |
|----------------------|--------------------------------------------------------------------------------------------------------------------------------------------|-----------|
| strains              |                                                                                                                                            |           |
| JM109                | Wild-type <i>E. coli</i>                                                                                                                   | ATCC      |
| BL21(DE3)            | Wild-type <i>E. coli</i>                                                                                                                   | ATCC      |
| MG1655               | Wild-type <i>E. coli</i> K12; F- $\lambda$ - rph-1                                                                                         | ATCC      |
| SC-1                 | <i>E. coli</i> K12 $\Delta wcaJ$                                                                                                           | This work |
| SR-1                 | <i>E. coli</i> K12 $\Delta lon$                                                                                                            | This work |
| SR-2                 | <i>E. coli</i> K12 $\Delta hns$                                                                                                            | This work |
| SR-3                 | <i>E. coli</i> K12 <i>mota::rcsa</i>                                                                                                       | This work |
| SR-4                 | <i>E. coli</i> K12 $\Delta lon$ $\Delta hns$                                                                                               | This work |
| SR-5                 | <i>E. coli</i> K12 $\Delta lon$ <i>mota::rcsa</i>                                                                                          | This work |
| SR-6                 | <i>E. coli</i> K12 $\Delta hns$ <i>mota::rcsa</i>                                                                                          | This work |
| SR-7                 | <i>E. coli</i> K12 $\Delta lon$ $\Delta hns$ <i>mota::rcsa</i>                                                                             | This work |
| SP-1                 | <i>E. coli</i> K12 <i>flie::galu</i>                                                                                                       | This work |
| SP-2                 | <i>E. coli</i> K12 <i>flie::galu flgg::gale</i>                                                                                            | This work |
| SP-3                 | <i>E. coli</i> K12 <i>flie::galu flgg::gale flga::gmd</i>                                                                                  | This work |
| SP-4                 | <i>E. coli</i> K12 <i>flie::galu flgg::gale flga::gmd flit::manc</i>                                                                       | This work |
| SP-5                 | <i>E. coli</i> K12 <i>flie::galu flgg::gale flga::gmd flit::manc flir::manb</i>                                                            | This work |
| SRP-1                | <i>E. coli</i> K12 <i>flie::galu flgg::gale flga::gmd flit::manc flir::manb mota::rcsa</i>                                                 | This work |
| SRP-2                | <i>E. coli</i> K12 <i>flie::galu flgg::gale flga::gmd flit::manc flir::manb mota::rcsa <math>\Delta lon</math></i>                         | This work |
| SRP-3                | <i>E. coli</i> K12 <i>flie::galu flgg::gale flga::gmd flit::manc flir::manb mota::rcsa <math>\Delta hns</math></i>                         | This work |
| SRP-4                | <i>E. coli</i> K12 <i>flie::galu flgg::gale flga::gmd flit::manc flir::manb mota::rcsa <math>\Delta lon</math> <math>\Delta hns</math></i> | This work |
| BL21-CAE             | BL21(DE3) bearing PACY-CAE                                                                                                                 | This work |
| Plasmid              |                                                                                                                                            |           |
| pCas9                | <i>repA101</i> (Ts) <i>kan</i> <i>Pcas-cas9</i> <i>ParaB-Red</i> <i>lacIq</i> <i>Ptre-sgRNA-Pmb1</i>                                       | This work |
| pTarget              | pMB1 <i>aadA</i> <i>sgRNA</i>                                                                                                              | This work |
| PACYDUET1            | p15A <i>CmR</i> <i>PT7</i> <i>T7 terminator</i> <i>PlacI-lacI</i>                                                                          | This work |
| PCAY-CAE             | p15A <i>CmR</i> <i>PT7-cae</i> <i>PlacI-lacI</i>                                                                                           | This work |
| pTarget- <i>flie</i> | pMB1 <i>aadA</i> <i>sgRNA-flie</i>                                                                                                         | This work |
| pTarget- <i>flgg</i> | pMB2 <i>aadA</i> <i>sgRNA-flgg</i>                                                                                                         | This work |
| pTarget- <i>flga</i> | pMB3 <i>aadA</i> <i>sgRNA-flga</i>                                                                                                         | This work |
| pTarget- <i>flit</i> | pMB4 <i>aadA</i> <i>sgRNA-flit</i>                                                                                                         | This work |
| pTarget- <i>flir</i> | pMB5 <i>aadA</i> <i>sgRNA-flir</i>                                                                                                         | This work |
| pTarget- <i>mota</i> | pMB6 <i>aadA</i> <i>sgRNA-mota</i>                                                                                                         | This work |
| pTarget- <i>lon</i>  | pMB7 <i>aadA</i> <i>sgRNA-lon</i>                                                                                                          | This work |
| pTarget- <i>hns</i>  | pMB8 <i>aadA</i> <i>sgRNA-hns</i>                                                                                                          | This work |

Table S2: Primers used in this study

| Names  | Sequence (5'-3')                        |
|--------|-----------------------------------------|
| PACY-T | TTAACCTAGGCTGCTGCCACC                   |
| PACY-B | ATATCTCCTTATTATTCTACAGGGGAATTGTTATCCGCT |
| CAE-T  | TAGAAATAATAAGGAGATATACCATGGGCCATCAC     |

---

|                         |                                                                                                  |
|-------------------------|--------------------------------------------------------------------------------------------------|
| CAE-B                   | GTGGCAGCAGCCTAGGTTAATTAGATGTAAGCCACCGGGTAGGTA                                                    |
| pTarget- <i>wcaj</i> -L | GTCAGCACATTGATAAACTGGTTTTAGAGCTAGAAATAGCAAGTT                                                    |
| pTarget- <i>wcaj</i> -R | CAGTTTATCAATGTGCTGACACTAGTATTATACCTAGGACTGAGC                                                    |
| T- <i>wcaj</i> -L       | TGCAGACCGGGGCGATAAAATTTT                                                                         |
| T- <i>wcaj</i> -R       | GGGCTAATAACAGGAACAACGTATGAGCTTACGTGAAAAAACCATCAGCG                                               |
| D- <i>wcaj</i> -L       | TTTCACGTAAGCTCATACTGTTGTTCTGTTATTAGCCCCCTAC                                                      |
| D- <i>wcaj</i> -R       | GAAAAAATCCCGGCGCGAAGA                                                                            |
| pTarget- <i>lon</i> -L  | TAGAACCGATGTAAGTACGGGTTTTAGAGCTAGAAATAGCAAGTT                                                    |
| pTarget- <i>lon</i> -R  | CCGTACTTACATCGGTTCTAACTAGTATTATACCTAGGACTGAGC                                                    |
| T- <i>lon</i> -L        | CGCAGGTTGAACCGGAAGATC                                                                            |
| T- <i>lon</i> -R        | TTGCGCGAGGTCAAGAGCTCTCTCTAGTTTAATTTCCGCC                                                         |
| D- <i>lon</i> -L        | GAAATTAAACTAAGAGAGAGCTCTTGACCTCGCGCAAAATGCAC                                                     |
| D- <i>lon</i> -R        | GACAAGAAACGGGGGCAATTGT                                                                           |
| pTarget- <i>hns</i> -L  | CGCGAAATGCTGATCGCTGAGTTTTAGAGCTAGAAATAGCAAGTT                                                    |
| pTarget- <i>hns</i> -R  | TCAGCGATCAGCATTTTCGCGACTAGTATTATACCTAGGACTGAGC                                                   |
| T- <i>hns</i> -L        | GATTGCAAAGGCGTTGAATTAGC                                                                          |
| T- <i>hns</i> -R        | CAAACCACCCCAATATAAGTTTGAGGATTGCACTTGCTTAAATCCCG                                                  |
| D- <i>hns</i> -L        | CGGGATTTTAAGCAAGTGCAATCCTCAAACCTATATTGGGGTGTTTG                                                  |
| D- <i>hns</i> -R        | GTATATGCGTTCTCCCTTACGAAG                                                                         |
| pTarget- <i>mota</i> -L | GCCGCAACAATACCAAACGCGTTTTAGAGCTAGAAATAGCAAGTT                                                    |
| pTarget- <i>mota</i> -R | GCGTTTGGTATTGTTGCGGCACTAGTATTATACCTAGGACTGAGC                                                    |
| T- <i>mota</i> -L       | CGATGTTGCGCTGCTTATTCAC TTC                                                                       |
| T- <i>mota</i> -R       | TCCTTGTTGAGTTAATCTTAAGGGTCTGATCACATTATACGAGCCGATGATTAATTGTCAAACCTTCCTCGGCA<br>TTTATTGGCTTACG     |
| M- <i>rcsa</i> -L       | GCTCGTATAATGTGATCAGACCCCTTAAGATTAAC TCACACAAGGAGATATACCATGTCAACGATTATTATGGATT<br>TATGTAGTTACACCC |
| M- <i>rcsa</i> -R       | GTTGATGGCGAAATCTTAGCGCATGTTGACAAAAATACCATTAGTCA                                                  |
| D- <i>mota</i> -L       | ATTTTGTCAACATGCGCTAAGATTTGCCATCAACCGATAAAGCAG                                                    |
| D- <i>mota</i> -R       | ACTTCCAGCTGCAACTGCTG                                                                             |
| pTarget- <i>flie</i> -L | AGCGATACAGGGGATTGAAGGTTTTAGAGCTAGAAATAGCAAGTT                                                    |
| pTarget- <i>flie</i> -R | CTTCAATCCCCTGTATCGCTACTAGTATTATACCTAGGACTGAGC                                                    |
| T- <i>flie</i> -L       | ATTAAATTATCCAGAGGTTACTGTTGCGTCT                                                                  |
| T- <i>flie</i> -R       | AAGAAGAGATGGGCATTAAGAAGTAAGGCTACGGCGATGAGTGC                                                     |
| M- <i>galu</i> -L       | GCCGTAGCCTTACTTCTTAATGCCCATCTCTTCTTCAAGC                                                         |
| M- <i>galu</i> -R       | ATCGGCTCGTATAATGTGATCAGACCTTTGTTTAACTTTAAGAAGGAGATATACCATGGCTGCCATTAATACGAA<br>AGTCAAAAAA        |

---

---

|                         |                                                                                              |
|-------------------------|----------------------------------------------------------------------------------------------|
| D- <i>flie</i> -L       | TCCTTCTTAAAGTTAAACAAAGGTCTGATCACATTATACGAGCCGATGATTAATTGTCAATCTCGTCTCCCGGAT<br>AATTTCTGG     |
| D- <i>flie</i> -R       | GCAGACGCAGTTTCGTGAAC TTT                                                                     |
| pTarget- <i>flgg</i> -L | GATGTCGCGATTAAAGGGCAGTTTTAGAGCTAGAAATAGCAAGTT                                                |
| pTarget- <i>flgg</i> -R | TGCCCTTTAATCGCGACATCACTAGTATTATACCTAGGACTGAGC                                                |
| T- <i>flgg</i> -L       | AAATCACTATTGCTGCCGATGGC                                                                      |
| T- <i>flgg</i> -R       | TCCTTCTTAAAGTTAAACAAAGGTCTGATCACATTATACGAGCCGATGATTAATTGTCAAAAGTGCATATGTCTT<br>CTTGCCGG      |
| M- <i>gale</i> -L       | ATCGGCTCGTATAATGTGATCAGACCTTTGTTTAACTTTAAGAAGGAGATATACCATGAGAGTTCTGGTTACCG<br>GTGG           |
| M- <i>gale</i> -R       | CGCCACGTTGATTAATCGGGATATCCCTGTGGATGGC                                                        |
| D- <i>flgg</i> -L       | CACAGGGATATCCCGATTAATCAACGTGGCGGAAGAACTG                                                     |
| D- <i>flgg</i> -R       | TAGCGCGGCACAGTATCAAAG                                                                        |
| pTarget- <i>flga</i> -L | TTGATATCCAGCACCGTACGGTTTTAGAGCTAGAAATAGCAAGTT                                                |
| pTarget- <i>flga</i> -R | CGTACGGTGCTGGATATCAAAC TAGTATTATACCTAGGACTGAGC                                               |
| T- <i>flga</i> -L       | GACGTGTCATACGATCAGTTACTCTG                                                                   |
| T- <i>flga</i> -R       | CTGGAGTCATAAGAAGGTCAGGCGCTGAACAATG                                                           |
| M- <i>gmd</i> -L        | GTTACAGCGCCTGACCTTCTTATGACTCCAGCGCGATCG                                                      |
| M- <i>gmd</i> -R        | ATCGGCTCGTATAATGTGATCAGACCTTTGTTTAACTTTAAGAAGGAGATATACCATGTCAAAAGTCGCTCTCAT<br>CACC          |
| D- <i>flga</i> -L       | TCCTTCTTAAAGTTAAACAAAGGTCTGATCACATTATACGAGCCGATGATTAATTGTCAAAAAAAGTTGTGCA<br>ATTGCGATGTG     |
| D- <i>flga</i> -R       | AATACGGTATTGCAGTTCTGCGG                                                                      |
| pTarget- <i>flit</i> -L | CGAAATGGCGTATGTGAATGGTTTTAGAGCTAGAAATAGCAAGTT                                                |
| pTarget- <i>flit</i> -R | CATTACATACGCCATTTGACTAGTATTATACCTAGGACTGAGC                                                  |
| T- <i>flit</i> -L       | AGCAGTTCGAAAACAACAGTAATTCCAAG                                                                |
| T- <i>flit</i> -R       | TCCTTCTTAAAGTTAAACAAAGGTCTGATCACATTATACGAGCCGATGATTAATTGTCAAGCCAGGCGAAATAT<br>AAATGCGG       |
| M- <i>manc</i> -L       | ATCGGCTCGTATAATGTGATCAGACCTTTGTTTAACTTTAAGAAGGAGATATACCATGGCGCAGTCGAAACTCT<br>ATC            |
| M- <i>manc</i> -R       | GCCATAGGCACTTAATTACACCCGTCCGTAGCGATC                                                         |
| D- <i>flit</i> -L       | CTACGGACGGGTGTAATTAAGTGCCTATGGCGATCAGGG                                                      |
| D- <i>flit</i> -R       | ATTTACACGCTGCACGCAATA                                                                        |
| pTarget- <i>flir</i> -L | GCGTTCGCTCAGAATCGGCGGTTTTAGAGCTAGAAATAGCAAGTT                                                |
| pTarget- <i>flir</i> -R | CGCCGATTCTGAGCGAACGCACTAGTATTATACCTAGGACTGAGC                                                |
| T- <i>flir</i> -L       | GATTATCGACCTGGTGATAGCCAG                                                                     |
| T- <i>flir</i> -R       | TCCTTCTTAAAGTTAAACAAAGGTCTGATCACATTATACGAGCCGATGATTAATTGTCAACGGCCAGAAGTACA<br>GGTTTAACC      |
| M- <i>manb</i> -L       | ATCGGCTCGTATAATGTGATCAGACCTTTGTTTAACTTTAAGAAGGAGATATACCATGAAAAAATTAACCTGCTT<br>TAAAGCCTATGAT |

---

|                     |                                                 |
|---------------------|-------------------------------------------------|
| <i>M-manb</i> -R    | ATACGATTAAGTAAACCTAATGCCATTACTCGTTCAGCAACGTCAGC |
| <i>D-flir</i> -L    | CGTTGCTGAACGAGTAATGGCATTAGGTTTACTTAATCGTATGGCC  |
| <i>D-flir</i> -R    | TCCATAATAATCGTTGACATGGCATACCC                   |
| <i>reca</i> -T-qPCR | CATCCATGGAACGGTCTTCACC                          |
| <i>reca</i> -B-qPCR | ATGGCTATCGACGAAAACAAACAGAAA                     |
| <i>wza</i> -T-qPCR  | ATGATGAAATCCAAAATGAAATTGATGCCAT                 |
| <i>wza</i> -B-qPCR  | TTGATGACGTCTTTGCCCATCG                          |

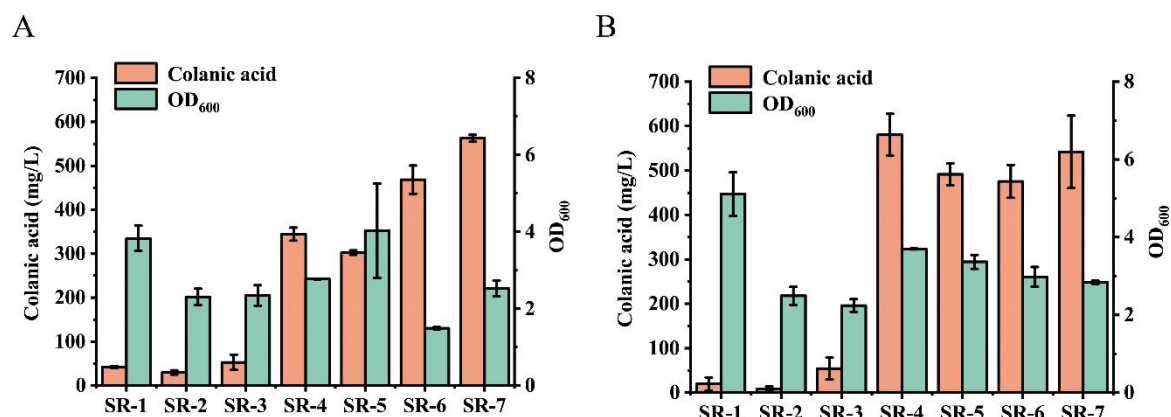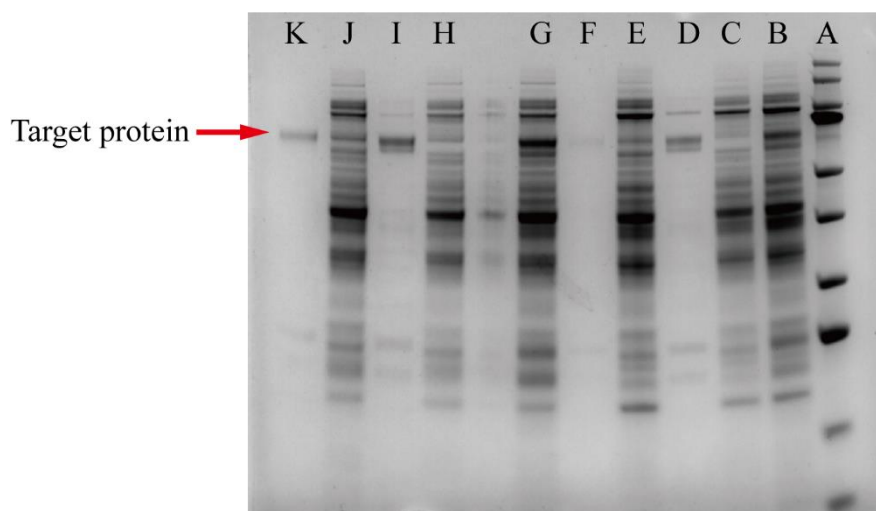

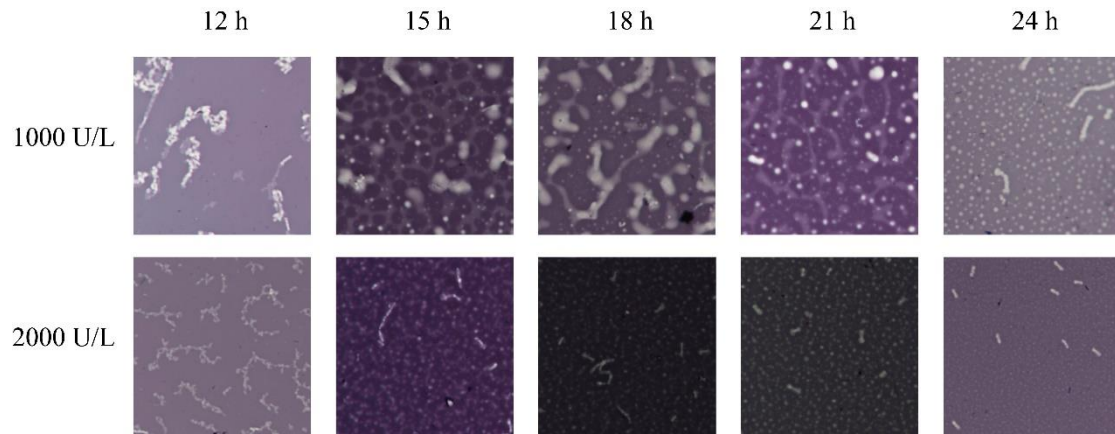

**Supplementary Figure S3 Colanic acid capsule layer inhibited strain growth and glucose acquisition.** After adding colanic acid hydrolase, the capsule was disrupted. The cells were released from the colanic acid capsule. The large white and spherical ones were colanic acid.

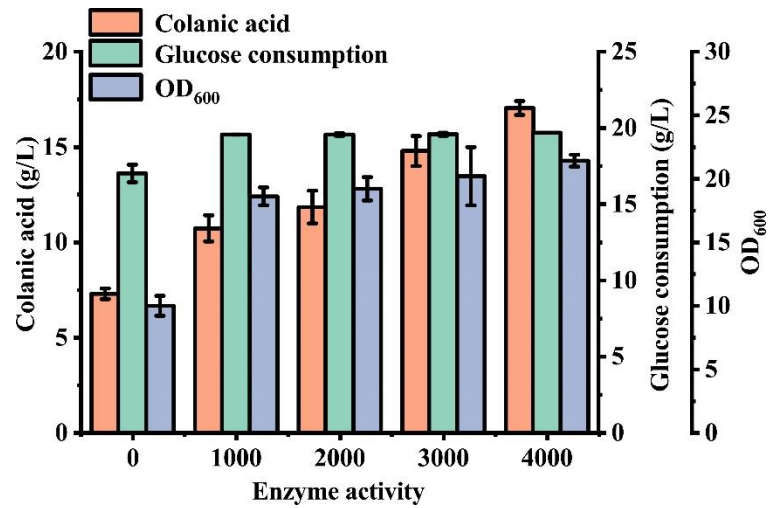

**Supplementary Figure S4 The effect of adding different amounts of colanic acid hydrolase on colanic acid production.** SRP-4 strain was cultivated in TBG medium at 30°C, 220 rpm in shake flasks for 48 h. 1000 U/L, 2000 U/L, 3000 U/L and 4000 U/L colanic acid hydrolase were added at 12 h.
